# Supplementary material for: Early Jurassic climate and atmospheric CO 2 concentration in the Sichuan paleobasin, Southwest China
Source: Copernicus journal article supplement (doi:10.5194/cp-2020-35), 2020-05-13
Supplement: Supplementary file 1 [file cp-2020-35-supplement.zip]

Archive with 9 entries (9 files):
- Note S2-pCO2 parameters.pdf
- Table S1-J1 calcisol data-two sections.pdf
- Table S2-J1 climate-sensitve sedi-Sichuan.pdf
- Table S3-C-O isotopes of J1 lacustrine limestone.pdf
- Table S4-C-O iso & pCO2 data, Ya'an.pdf
- Table S5-J1 Composite pCO2 Data by paleosol.pdf
- Table S6-J1 Composite pCO2 Data by stomata.pdf
- Figures S1 to S6.pdf
- Note S1-facies determination.pdf
