# Supplementary material for: Early Jurassic climate and atmospheric CO 2 concentration in the Sichuan paleobasin, Southwest China
Source: Copernicus journal article supplement (doi:10.5194/cp-2020-35), 2020-05-13
Supplement: Supplementary file 1 [file cp-2020-35-supplement.zip › Table S1-J1 calcisol data-two sections.pdf]

**Table S1 Early Jurassic paleosols in Ya'an of Sichuan and Hechuan of Chongqing, Southwest China**

| Numbers                                 | Mem-<br>bers  |                                   | Paleosols    |                                                                |                    |               | Calcretes              |           |                         | (Sub-) Facies |                    |
|-----------------------------------------|---------------|-----------------------------------|--------------|----------------------------------------------------------------|--------------------|---------------|------------------------|-----------|-------------------------|---------------|--------------------|
|                                         |               | Age                               | Depth (m)    | Structure                                                      | Color              | Mansell color | BK (cm)                | Size (cm) | Shape                   |               | Percent (%)        |
| 1. Shaping section, Ya'an               |               |                                   |              |                                                                |                    |               |                        |           |                         |               |                    |
| J1z-01-01                               | Zhengzhuchong | Sinemurian                        | 4.5          | Subangular and prismatic peds; slickenside; abundant rhizolith | Dusky red          | 5R 3/4        | 170                    | 1-3       | Ginger-like, unregular  | <1            | Overbank           |
| J1z-02-001                              |               |                                   | 6.5          | Subangular peds; slickenside                                   | Dusky red          | 5R 3/4        | 120                    | 1-3       | Ginger-like, ellipsoid  | <1            | Overbank           |
| J1z-02-002                              |               |                                   | 7.3          | Subangular peds; slickenside                                   | Dusky red          | 5R 3/4        | 30                     | 1-4       | Ginger-like, unregular  | <1            | Overbank           |
| J1z-02-01                               |               |                                   | 9.8          | Angular peds; slickenside                                      | Dusky red          | 5R 3/4        | 90                     | 0.5-1.5   | Ginger-like, subglobal  | <1            | Overbank           |
| J1z-02-02                               |               |                                   | 12.7         | Subangular peds; slickenside                                   | Dusky red          | 5R 3/4        | 120                    | 1-3       | Ginger-like, unregular  | <1            | Overbank           |
| J1z-03-01                               |               |                                   | 16.3         | Angular ped, slickenside, mottles                              | Grayish red        | 5R 4/2        | 76                     | 1-3       | Ginger-like, unregular  | <1, up to 3-5 | Overbank           |
| J1z-04-01                               |               |                                   | 31.7         | Subangular peds; slickenside                                   | Dusky red          | 5R 3/4        | 70                     | 0.5-1.5   | Subglobular, ellipsoid  | <1            | Split fan-overbank |
| J1z-05-01                               |               |                                   | 39.6         | Subangular peds; slickenside                                   | Dusky red          | 5R 3/4        | 45                     | 1-3       | Ginger-like, unregular  | <2            | Split fan-overbank |
| J1z-05-02                               |               |                                   | 45.5         | Angular peds; slickenside                                      | Dusky red          | 5R 3/4        | 63                     | 3-5       | Ginger-like, ellipsoid  | 5-10          | Split fan-overbank |
| J1z-06-01a                              |               |                                   | 54.0         | Subangular peds; slickenside                                   | Dusky red          | 5R 4/2        | 90                     | 0.5-3     | Ginger-like, unregular  | <0.5          | Split fan-overbank |
| J1z-06-01b                              | 55.3          | Angular ped, slickenside, mottles | Dusky red    | 5R 4/2                                                         | 80                 | 0.5-3         | Ginger-like, unregular | <0.5      | Split fan-overbank      |               |                    |
| J1z-06-01                               | 56.7          | Subangular peds; slickenside      | Dusky red    | 5R 4/2                                                         | 15                 | 0.5-3         | Ginger-like, ellipsoid | <0.5      | Split fan-overbank      |               |                    |
| J1z-06-01d                              | 57.6          | Subangular peds; slickenside      | Dusky red    | 5R 4/2                                                         | 40                 | 0.5-3         | Ginger-like, ellipsoid | <0.5      | Split fan-overbank      |               |                    |
| J1z-07-01a                              | Ma'anshan     | Pleinsbachian                     | 65.4         | Angular ped, slickenside, mottles                              | Dusky red          | 5R 4/2        | 30                     | 1-2       | Ginger-like, unregular  | <0.5          | Interchannel       |
| J1z-07-01b                              |               |                                   | 66.9         | Subangular peds; slickenside                                   | Dusky red          | 5R 4/2        | 20                     | 1-2       | Ginger-like, unregular  | <0.5          | Interchannel       |
| J1z-07-01                               |               |                                   | 69.8         | Subangular peds; slickenside                                   | Dusky red          | 5R 4/2        | 20                     | 1-2       | Ginger-like, unregular  | <0.5          | Interchannel       |
| J1z-08-01                               |               |                                   | 84.7         | Subangular ped, slickenside                                    | Dusky red          | 5R 4/2        | 50                     | 2-4       | Unregular, ellipsoid    | <1            | Flooding plain     |
| J1z-10-01                               |               |                                   | 89.5         | Subangular ped, slickenside                                    | Dusky red          | 5R 4/2        | 135                    | 2-15      | Unregular, ellipsoid,   | <1            | Flooding plain     |
| J1z-10-02                               |               |                                   | 94.4         | Angular ped, slickenside, mottles                              | Dusky red          | 5R 4/2        | 50                     | 0.5-1.5   | Ginger-like             | <0.5          | Flooding plain     |
| J1z-11-01                               |               |                                   | 106.7        | Subangular ped, slickenside                                    | Blackish red       | 5R 2/2        | 70                     | 1-5       | Ginger-like             | <1            | Flooding plain     |
| J1z-11-02                               |               |                                   | 111.7        | Subangular ped, slickenside                                    | Blackish red       | 5R 2/2        | 75                     | 1-2       | Ginger-like, subglobal  | <1            | Flooding plain     |
| J1z-12-01                               |               |                                   | 148.9        | Angular ped, slickenside, mottles                              | Blackish red       | 5R 2/2        | 30                     | 2-8       | Ginger-like presominant | <1            | Overbank           |
| J1z-14-01                               |               |                                   | 176.1        | Angular ped, slickenside, mottles                              | Blackish red       | 5R 2/2        | 42                     | 2-3       | Ginger-like             | <0.5          | Interchannel       |
| J1z-14-02                               | 187.3         | Subangular ped, slickenside       | Blackish red | 5R 2/2                                                         | 110                | 1-3           | Ginger-like, ellipsoid | <1        | Interchannel            |               |                    |
| J1z-15-01                               | 194.3         | Angular ped, slickenside, mottles | Blackish red | 5R 2/2                                                         | 120                | 1-3           | Ginger-like, ellipsoid | <1        | Overbank                |               |                    |
| J1z-16-01                               | Da'anzhai     | Toarcian                          | 213.7        | Subangular ped, slickenside                                    | Blackish red       | 5R 2/2        | 62                     | 1-3       | Ginger-like             | <0.5          | Flooding plain     |
| J1z-18-01                               |               |                                   | 252.7        | Subangular ped, slickenside                                    | Blackish red       | 5R 2/2        | 66                     | 1-3       | Ginger-like             | <0.5          | Flooding plain     |
| J1z-19-01                               |               |                                   | 272.3        | Platy ped                                                      | Blackish red       | 5R 2/2        | 120                    | 0.5-1.2   | Ginger-like, subglobal  | <0.2          | Back lakeshore     |
| J1z-20-01                               |               |                                   | 294.3        | Platy ped, slickenside                                         | Blackish red       | 5R 2/2        | 83                     | 0.5-1.5   | Ginger-like, ellipsoid  | <0.2          | Back lakeshore     |
| J1z-22-01                               |               |                                   | 324.5        | Platy ped                                                      | Blackish red       | 5R 2/2        | 32                     | 1-3       | Ginger-like, ellipsoid  | <0.5          | Back lakeshore     |
| J1z-23-01                               |               |                                   | 334.8        | Platy ped                                                      | Blackish red       | 5R 2/2        | 32                     | 1-3       | Ginger-like, ellipsoid  | <0.5          | Back lakeshore     |
| 2. Tanba and Maliuping section, Hechuan |               |                                   |              |                                                                |                    |               |                        |           |                         |               |                    |
| 18CH-07a                                | Da'an<br>zhai | Plien                             | 375.1        | Angular ped, slickenside                                       | Grayish red        | 5R 4/2        | 80                     | 0.2-0.5   | Subglobular, ellipsoid  | <1            | Split fan-overbank |
| 18CH-07b                                |               |                                   | 381.4        | Subangular ped, slickenside, mottle, rootlet, leaching,        | Dark reddish brown | 10R 3/4       | 150                    | 0.2-0.5   | Ginger-like, ellipsoid  | <1            | Split fan-overbank |
| 18CH-07c                                |               |                                   | 384.1        | Angular ped, slickenside, mottles                              | Pale reddish brown | 10R 5/4       | 40                     | 0.5-2     | Ginger-like, ellipsoid  | <1            | Split fan-overbank |
| 18HC-10                                 |               | Toa                               | 464.4        | Subangular ped, slickenside, mottle                            | Moderate red and   | 5R 4/6        | 130                    | 1-2       | Ginger-like, ellipsoid  | 3-10          | Back lakeshore     |
| 18HC-11                                 |               |                                   | 501.0        | Subangular ped, slickenside, mottle, leaching, rootlet, burrow | Dusky red          | 5R 4/2        | 45                     | 0.5-2     | Ginger-like, subglobal  | <1            | Back lakeshore     |
