# Supplementary material for: Early Jurassic climate and atmospheric CO 2 concentration in the Sichuan paleobasin, Southwest China
Source: Copernicus journal article supplement (doi:10.5194/cp-2020-35), 2020-05-13
Supplement: Supplementary file 1 [file cp-2020-35-supplement.zip › Table S2-J1 climate-sensitve sedi-Sichuan.pdf]

**Table S2 Occurrence list of the Early Jurassic climate-sensitive sediments in the GSB**

| Section                             | Locations           | Hori-<br>zons | Members      | Age           | Sources            |
|-------------------------------------|---------------------|---------------|--------------|---------------|--------------------|
| <b>Calcsols</b>                     |                     |               |              |               |                    |
| A4                                  | Shaping, Ya'an      | 16            | Zhenzhuchong | Sinemurian    | This work          |
| A4                                  | Shaping, Ya'an      | 10            | Ma'anshan    | Pleinsbachian | This work          |
| A4                                  | Shaping, Ya'an      | 4             | Da'anzhai    | Toarcian      | This work          |
| A5                                  | Wujiaba, Zigong     | >1            | Ma'anshan    | Pleinsbachian | SBG, 1980a         |
| A6                                  | Tanba, Hechuan      | 3             | Ma'anshan    | Pleinsbachian | This work          |
| A6                                  | Maliuping, Hechuan  | 2             | Da'anzhai    | Toarcian      | This work          |
| A8                                  | Gaoxian, Dafang     | >1            | Da'anzhai    | Toarcian      | Zhang et al., 2016 |
| A8                                  | Gaoxian, Dafang     | >1            | Ma'anshan    | Pleinsbachian | Zhang et al., 2016 |
| A8                                  | Gaoxian, Dafang     | >1            | Dongyuemiao  | Sinemurian    | Zhang et al., 2016 |
| A8                                  | Gaoxian, Dafang     | >1            | Zhenzhuchong | Sinemurian    | Zhang et al., 2016 |
| A9                                  | Qizhai, Tianzhu     | >2            | Zhenzhuchong | Sinemurian    | Li and Chen, 2010  |
| A10                                 | Hulukou, Weiyuan    | 2             | Ma'anshan    | Pleinsbachian | SBG, 1980a         |
| A10                                 | Hulukou, Weiyuan    | 2             | Zhenzhuchong | Sinemurian    | SBG, 1980a         |
| A11                                 | Liujiachang, Nanxi  | >1            | Da'anzhai    | Toarcian      | SBG, 1980a         |
| A12                                 | Shibei, Gongxian    | >1            | Da'anzhai    | Toarcian      | Liang et al., 2006 |
| A13                                 | Geyaoguan, Gulin    | >1            | Ma'anshan    | Pleinsbachian | SBG, 1976          |
| A15                                 | Shuishikou, Yunyang | >1            | Da'anzhai    | Toarcian      | Meng et al., 2005  |
| A15                                 | Shuishikou, Yunyang | >1            | Dongyuemiao  | Sinemurian    | Meng et al., 2005  |
| A16                                 | Taiyuan, Fengdu     | >1            | Ma'anshan    | Pleinsbachian | SBG, 1975          |
| A17                                 | Yaxi, Zunyi         | >1            | Ma'anshan    | Pleinsbachian | Yang, 2015         |
| A17                                 | Yaxi, Zunyi         | >1            | Dongyuemiao  | Sinemurian    | Yang, 2015         |
| <b>Micritic dolomitic sediments</b> |                     |               |              |               |                    |
| A4                                  | Shaping, Ya'an      | 4             | Da'anzhai    | Toarcian      | This work          |
| A5                                  | Ziliujing, Zigong   | >1            | Da'anzhai    | Toarcian      | Peng, 2009         |
| A10                                 | Hulukou, Weiyuan    | >1            | Da'anzhai    | Toarcian      | SBG, 1980a         |
| A11                                 | Liujiachang, Nanxi  | >1            | Da'anzhai    | Toarcian      | SBG, 1980a         |
| A14                                 | Wangu, Dazu         | >1            | Da'anzhai    | Toarcian      | SBG, 1980a         |
| A17                                 | Laocheng, Zunyi     | >1            | Ma'anshan    | Pleinsbachian | Mo and Yu, 1987    |
| A17                                 | Laocheng, Zunyi     | >1            | Dongyuemiao  | Pleinsbachian | Mo and Yu, 1987    |
| <b>Gypsum</b>                       |                     |               |              |               |                    |
| A5                                  | Wujiaba, Zigong     | 3             | Da'anzhai    | Toarcian      | SBG, 1980a         |
| A6                                  | Maliuping, Hechuan  | 1             | Da'anzhai    | Toarcian      | This work          |

Liang, B., Wang, Q. W., and Kan, Z. Z.: Geochemistry of Early Jurassic mudrocks from Ziliujing Formation and implications for source-area and weathering in dinosaur fossils site in Gongxian, Sichuan province, J. Min. Petr., 26(3), 94-99, 2006 (in Chinese with English abstract).

Meng, F. S., Chen, H. M., and Li, X. B.: Study on Lower Middle Jurassic boundary in Chongqing region, Geol. Min. Resour. S China, 3, 64-71, 2005 (in Chinese with English abstract).

Mo, Y. Z. and Yu, H. Y.: The discovery and its geological significance of dolomite in Ziliujing Groups of Middle and Lower Jurassic Series in Ma'anshan Member, Geol Guizhou, 10(1), 110-113, 1987 (in Chinese with English abstract).

SBG (Sichuan Bureau of Geology): Reports of 1:200,000 Regional Geology Investigations (Profile Qianjiang), 48, 1975 (in Chinese).

SBG (Sichuan Bureau of Geology): Reports of 1:200,000 Regional Geology Investigations (Profile Xuyong), 55, 1976 (in Chinese).

SBG (Sichuan Bureau of Geology): Reports of 1:200,000 Regional Geology Investigations (Profiles Suining, Zigong, Neijiang, Yibin, and Luzhou), 43-50, 1980a (in Chinese).

Yang, G. L.: Heavy mineral stratigraphy of Mesozoic continental clastic facies in Yaxi area, northern Guizhou, J. Stratigr., 39(1), 89-96, 2015 (in Chinese with English abstract).

Zhang, X. S., Zhao, B., Tan, M., Zhou, B. Y., Sun, J.: Stratigraphic Characteristics of Ziliujing Formation, Jurassic Series and Discovery of Dinosaur Footprints in Dafang, Guizhou, Geol. Guizhou, 33(1), 50-70, 2016 (in Chinese with English abstract).
