# Supplementary material for: Early Jurassic climate and atmospheric CO 2 concentration in the Sichuan paleobasin, Southwest China
Source: Copernicus journal article supplement (doi:10.5194/cp-2020-35), 2020-05-13
Supplement: Supplementary file 1 [file cp-2020-35-supplement.zip › Table S3-C-O isotopes of J1 lacustrine limestone.pdf]

**Table S3 Carbon-oxygen isotopes of lacustrine carbonates from the Lower Jurassic Ziliujing Fm (Da'anzhai Mem) in GSB**

| Section                                                               | Sample     | Depth (m) | Lithology          | $\delta^{13}\text{C}$ | $\delta^{12}\text{O}$ |
|-----------------------------------------------------------------------|------------|-----------|--------------------|-----------------------|-----------------------|
| A4, Shaping section, Ya'an                                            |            |           |                    |                       |                       |
|                                                                       | J1z-19S    | 275.0     | Mudstone           | -4.07                 | -12.28                |
|                                                                       | J1z-20S1   | 285.0     | Dolomitic mudstone | -3.03                 | -11.13                |
|                                                                       | J1z-20S2   | 288.8     | Dolomitic mudstone | -2.74                 | -10.67                |
|                                                                       | J1z-20S3   | 289.5     | Dolomitic mudstone | -3.48                 | -11.29                |
|                                                                       | J1z-20S4   | 293.9     | Dolomitic mudstone | -2.68                 | -10.50                |
|                                                                       | J1z-21S1   | 308.9     | Marlstone          | -3.60                 | -11.38                |
|                                                                       | J1z-21S2   | 312.6     | Marlstone          | -2.54                 | -10.52                |
|                                                                       | J1z-21S3   | 315.1     | Marlstone          | -2.02                 | -9.91                 |
|                                                                       | J1z-21S4   | 316.9     | Marlstone          | -2.48                 | -10.36                |
|                                                                       | J1z-21S5   | 318.6     | Marlstone          | -2.31                 | -10.40                |
| A5, Gaodongqiao section, Zigong ( <a href="#">Wang et al., 2006</a> ) |            |           |                    |                       |                       |
|                                                                       | ZG20b1     |           | Shelly wackestone  | -3.29                 | -9.14                 |
|                                                                       | ZG21b1     |           | Shelly mudstone    | -4.49                 | -8.16                 |
|                                                                       | GJ010b7    |           | Shelly mudstone    | -0.85                 | -6.78                 |
|                                                                       | GJ010b6    |           | Shelly mudstone    | -2.00                 | -7.26                 |
|                                                                       | GJ010b5    |           | Shelly mudstone    | -1.63                 | -8.62                 |
|                                                                       | GJ010b4    |           | Shelly wackestone  | -2.66                 | -8.52                 |
|                                                                       | GJ010b3    |           | Shelly mudstone    | -1.64                 | -7.11                 |
|                                                                       | GJ010b2    |           | Mudstone           | -2.41                 | -8.01                 |
|                                                                       | GJ010b1    |           | Mudstone           | -1.48                 | -6.75                 |
| A6, Tanba section, Hechuan ( <a href="#">Wang et al., 2006</a> )      |            |           |                    |                       |                       |
|                                                                       | CQ 001b2   |           | Shelly wackestone  | -0.08                 | -7.48                 |
|                                                                       | CQ 001b222 |           | Shelly mudstone    | 0.76                  | -6.63                 |
|                                                                       | CQ 001b3   |           | Shelly wackestone  | 0.35                  | -8.08                 |
|                                                                       | CQ 001b4   |           | Mudstone           | -1.21                 | -6.15                 |
|                                                                       | CQ 001b5   |           | Shelly wackestone  | -3.46                 | -8.52                 |
|                                                                       | CQ 001b6   |           | Mudstone           | 1.62                  | -4.56                 |

Wang, Q. W., Liang, B., Kan, Z. Z.: Carbon and oxygen isotopic compositions of lacustrine carbonates of the Early Jurassic Ziliujing Formation in the Sichuan Basin and their paleolimnological significance, J. Min. Petr., 26(2), 87-91, 2006 (in Chinese with English abstract).
