# Supplementary material for: Early Jurassic climate and atmospheric CO 2 concentration in the Sichuan paleobasin, Southwest China
Source: Copernicus journal article supplement (doi:10.5194/cp-2020-35), 2020-05-13
Supplement: Supplementary file 1 [file cp-2020-35-supplement.zip › Table S4-C-O iso & pCO2 data, Ya'an.pdf]

**Table S4  $p$  CO<sub>2</sub> estimate by carbon isotope of pedogenic carbonates from the Lower Jurassic Ziliujing Fm at the Shaping section, Ya'an of Sichuan**

| 1             | 2           | 3    | 4    | 5     | 6     | 7                     | 8                     | 9                       | 10                      | 11                      | 12                         | 13                      | 14                      | 15             | 16             | 17             | 18             |
|---------------|-------------|------|------|-------|-------|-----------------------|-----------------------|-------------------------|-------------------------|-------------------------|----------------------------|-------------------------|-------------------------|----------------|----------------|----------------|----------------|
| Mem           | Calcrete    | BK   | BK   | Depth | Age   | $\delta^{13}\text{C}$ | $\delta^{12}\text{O}$ | $\delta^{12}\text{O}_c$ | $\delta^{13}\text{C}_c$ | $\delta^{13}\text{C}_s$ | $\delta^{13}\text{C}_{sc}$ | $\delta^{13}\text{C}_r$ | $\delta^{13}\text{C}_a$ | $p\text{CO}_2$ | $p\text{CO}_2$ | $p\text{CO}_2$ | $p\text{CO}_2$ |
| -ber          | sample      | (cm) | (cm) | (m)   | (Ma)  |                       |                       |                         |                         |                         |                            |                         |                         |                |                |                |                |
| Zhengzhuchong | J1Z-01-01A  | 170  | 30   | 4.5   | 198.8 | -7.93                 | -12.65                | -12.81                  | -7.81                   | -16.79                  | -16.64                     | -26.93                  | -7.51                   | 1423           | 1645           | 1262           | 1316           |
|               | J1Z-01-01B  |      |      |       |       | -7.70                 | -12.97                |                         |                         |                         |                            |                         |                         |                |                |                |                |
|               | J1z-02-001A | 120  | 100  | 6.5   | 198.6 | -7.87                 | -12.98                | -12.60                  | -8.10                   | -17.08                  | -16.93                     | -26.97                  | -7.55                   | 1325           | 1535           | 1176           | 1228           |
|               | J1z-02-001B |      |      |       |       | -8.24                 | -12.31                |                         |                         |                         |                            |                         |                         |                |                |                |                |
|               | J1z-02-002A | 30   | 25   | 7.3   | 198.5 | -7.71                 | -12.61                | -12.80                  | -7.80                   | -16.78                  | -16.63                     | -27.18                  | -7.74                   | 1488           | 1762           | 1353           | 1410           |
|               | J1z-02-002B |      |      |       |       | -7.81                 | -13.08                |                         |                         |                         |                            |                         |                         |                |                |                |                |
|               | J1Z-02-01A  | 90   | 60   | 9.8   | 198.2 | -7.50                 | -13.22                | -12.95                  | -7.37                   | -16.35                  | -16.20                     | -27.62                  | -8.14                   | 1774           | 2211           | 1702           | 1769           |
|               | J1Z-02-01B  |      |      |       |       | -7.24                 | -12.68                |                         |                         |                         |                            |                         |                         |                |                |                |                |
|               | J1z-02-02A  | 120  | 100  | 12.7  | 197.8 | -7.41                 | -13.26                | -13.10                  | -7.40                   | -16.38                  | -16.23                     | -27.52                  | -8.05                   | 1736           | 2139           | 1646           | 1711           |
|               | J1z-02-02B  |      |      |       |       | -7.40                 | -12.86                |                         |                         |                         |                            |                         |                         |                |                |                |                |
|               | J1Z-03-01A  | 76   | 56   | 16.3  | 197.4 | -6.89                 | -10.60                | -11.31                  | -6.90                   | -15.88                  | -15.74                     | -27.37                  | -7.91                   | 1922           | 2347           | 1809           | 1878           |
|               | J1Z-03-01B  |      |      |       |       | -6.91                 | -12.02                |                         |                         |                         |                            |                         |                         |                |                |                |                |
|               | J1Z-04-01A  | 70   | 40   | 31.7  | 195.6 | -6.67                 | -11.46                | -12.02                  | -6.27                   | -15.25                  | -15.11                     | -26.70                  | -7.30                   | 2048           | 2336           | 1803           | 1869           |
|               | J1Z-04-01B  |      |      |       |       | -5.87                 | -12.59                |                         |                         |                         |                            |                         |                         |                |                |                |                |
|               | J1Z-05-01B  | 45   | 10   | 39.6  | 194.7 | -6.11                 | -11.07                | -11.35                  | -5.83                   | -14.81                  | -14.68                     | -26.50                  | -7.12                   | 2228           | 2493           | 1926           | 1994           |
|               | J1z-05-01C  |      |      |       |       | -5.54                 | -11.64                |                         |                         |                         |                            |                         |                         |                |                |                |                |
|               | J1Z-05-02B  | 63   | 45   | 45.5  | 194.0 | -5.09                 | -12.83                | -12.01                  | -5.87                   | -14.85                  | -14.72                     | -26.05                  | -6.71                   | 2070           | 2200           | 1699           | 1760           |
|               | J1z-05-02C  |      |      |       |       | -6.65                 | -11.20                |                         |                         |                         |                            |                         |                         |                |                |                |                |
|               | J1z-06-01A  | 15   | 12   | 56.7  | 192.7 | -6.58                 | -12.58                | -12.80                  | -6.40                   | -15.38                  | -15.24                     | -26.03                  | -6.69                   | 1792           | 1901           | 1465           | 1520           |
|               | J1z-06-01B  |      |      |       |       | -6.32                 | -13.02                |                         |                         |                         |                            |                         |                         |                |                |                |                |
|               | J1z-07-01A  | 20   | 15   | 69.8  | 191.2 | -5.86                 | -12.48                | -12.80                  | -6.10                   | -15.08                  | -14.95                     | -26.57                  | -7.18                   | 2100           | 2364           | 1825           | 1891           |
|               | J1z-07-01B  |      |      |       |       | -6.39                 | -13.19                |                         |                         |                         |                            |                         |                         |                |                |                |                |
| DYM           | J1Z-08-01A  | 50   | 30   | 84.7  | 190.4 | -6.06                 | -12.41                | -12.89                  | -6.11                   | -15.09                  | -14.96                     | -27.48                  | -8.01                   | 2361           | 2967           | 2291           | 2374           |
|               | J1Z-08-01B  |      |      |       |       | -6.16                 | -13.38                |                         |                         |                         |                            |                         |                         |                |                |                |                |
|               | J1Z-10-01A  | 135  | 35   | 89.5  | 190.1 | -6.73                 | -13.21                | -12.91                  | -7.18                   | -16.16                  | -16.02                     | -27.39                  | -7.93                   | 1799           | 2193           | 1689           | 1754           |
|               | J1Z-10-01B  |      |      |       |       | -7.64                 | -12.61                |                         |                         |                         |                            |                         |                         |                |                |                |                |
|               | J1Z-10-02A  | 50   | 20   | 94.4  | 189.9 | -7.54                 | -13.51                | -12.17                  | -7.86                   | -16.84                  | -16.69                     | -27.08                  | -7.65                   | 1441           | 1689           | 1296           | 1351           |
|               | J1Z-10-02B  |      |      |       |       | -8.57                 | -11.41                |                         |                         |                         |                            |                         |                         |                |                |                |                |
|               | J1z-10-02C  |      |      |       |       | -7.47                 | -11.60                |                         |                         |                         |                            |                         |                         |                |                |                |                |
|               | J1z-11-01A  | 70   | 60   | 106.7 | 189.3 | -7.07                 | -12.63                | -12.60                  | -7.10                   | -16.08                  | -15.94                     | -26.35                  | -6.98                   | 1562           | 1711           | 1316           | 1369           |
|               | J1z-11-02A  | 75   | 65   | 111.7 | 189.1 | -7.47                 | -12.69                | -12.60                  | -7.60                   | -16.58                  | -16.43                     | -25.98                  | -6.65                   | 1268           | 1344           | 1030           | 1075           |
|               | J1z-11-02B  |      |      |       |       | -7.65                 | -12.55                |                         |                         |                         |                            |                         |                         |                |                |                |                |
|               | J1Z-12-01A  | 30   | 10   | 148.9 | 187.4 | -8.43                 | -11.52                | -12.68                  | -8.08                   | -17.06                  | -16.91                     | -26.15                  | -6.80                   | 1138           | 1226           | 937            | 981            |
|               | J1Z-12-01B  |      |      |       |       | -7.72                 | -13.85                |                         |                         |                         |                            |                         |                         |                |                |                |                |
|               | J1Z-14-01A  | 42   | 10   | 176.1 | 186.1 | -7.72                 | -13.83                | -13.78                  | -7.35                   | -16.33                  | -16.18                     | -26.45                  | -7.07                   | 1484           | 1641           | 1261           | 1313           |
|               | J1Z-14-01B  |      |      |       |       | -6.98                 | -13.74                |                         |                         |                         |                            |                         |                         |                |                |                |                |
|               | J1Z-14-02A  | 110  | 45   | 187.3 | 185.6 | -6.32                 | -13.34                | -13.00                  | -5.98                   | -14.96                  | -14.83                     | -25.88                  | -6.55                   | 1960           | 2045           | 1578           | 1636           |
|               | J1Z-14-02B  |      |      |       |       | -5.63                 | -12.67                |                         |                         |                         |                            |                         |                         |                |                |                |                |
|               | J1z-15-01A  | 120  | 110  | 194.3 | 185.3 | -6.99                 | -13.33                | -12.80                  | -7.00                   | -15.98                  | -15.84                     | -25.75                  | -6.44                   | 1446           | 1496           | 1149           | 1197           |
|               | J1z-15-01B  |      |      |       |       | -7.09                 | -12.30                |                         |                         |                         |                            |                         |                         |                |                |                |                |
| Ma'anshan     | J1Z-16-01A  | 62   | 12   | 213.7 | 184.4 | -5.98                 | -12.07                | -12.00                  | -5.54                   | -14.52                  | -14.39                     | -25.97                  | -6.64                   | 2233           | 2351           | 1818           | 1881           |
|               | J1z-16-01C  |      |      |       |       | -5.10                 | -11.98                |                         |                         |                         |                            |                         |                         |                |                |                |                |
|               | J1Z-18-01A  | 66   | 32   | 252.7 | 182.6 | -3.41                 | -5.18                 | -5.55                   | -3.52                   | -12.50                  | -12.39                     | -25.10                  | -5.85                   | 3463           | 3218           | 2498           | 2574           |
|               | J1Z-18-01B  |      |      |       |       | -3.62                 | -5.93                 |                         |                         |                         |                            |                         |                         |                |                |                |                |
|               | J1Z-19-01A  | 120  | 80   | 272.3 | 181.9 | -6.08                 | -12.67                | -12.59                  | -6.09                   | -15.07                  | -14.94                     | -24.50                  | -5.30                   | 1499           | 1368           | 1052           | 1094           |
|               | J1Z-19-01B  |      |      |       |       | -6.11                 | -12.50                |                         |                         |                         |                            |                         |                         |                |                |                |                |
|               | J1Z-20-01A  | 83   | 49   | 294.3 | 181.0 | -5.47                 | -10.66                | -10.37                  | -5.63                   | -14.61                  | -14.48                     | -27.00                  | -7.57                   | 2500           | 2982           | 2305           | 2386           |
|               | J1Z-20-01B  |      |      |       |       | -5.80                 | -10.07                |                         |                         |                         |                            |                         |                         |                |                |                |                |
|               | J1Z-22-01A  | 32   | 5    | 324.5 | 179.9 | -4.09                 | -7.68                 | -7.43                   | -4.14                   | -13.12                  | -13.00                     | -25.80                  | -6.48                   | 3170           | 3262           | 2529           | 2610           |
|               | J1Z-22-01B  |      |      |       |       | -4.20                 | -7.17                 |                         |                         |                         |                            |                         |                         |                |                |                |                |
| Da'anzhai     | J1z-23-01A  | 32   | 5    | 334.8 | 179.5 | -7.58                 | -11.84                | -11.70                  | -8.00                   | -16.98                  | -16.83                     | -26.90                  | -7.48                   | 1345           | 1548           | 1187           | 1239           |
|               | J1z-23-01B  |      |      |       |       | -8.33                 | -11.58                |                         |                         |                         |                            |                         |                         |                |                |                |                |

Notes:

- 1 DYM, Dongyuemiao Member
  - 3 BK thickness (cm)
  - 4 Sample depth (cm) to BK base
  - 5 Sample depth (m) to the log base
  - 6 Rough age (Ma) arranged by thickness distribution confined by the members in Table 1. Stage boundary age refers to [Cohen et al. \(2019\)](#)
  - 9 Mean oxygen isotope value of two or three measurements for the same calcrete sample
  - 10 Mean carbon isotope value of two or three measurements for the same calcrete sample
  - 11 Carbon-isotope value of calcrete calibrated with  $-8.98\text{‰} + \delta^{13}\text{C}_c$  ([Ekart et al., 1999](#))
  - 12 Carbon-isotope value of calcrete calibrated at 25 °C with  $(\delta^{13}\text{C}_c + 1000) / ((11.98 - 0.12 \cdot T) / 1000 + 1) - 1000$  ([Romanek et al., 1992](#))
  - 13 Carbon-isotope value of organic matters cited from references. Details refer to text
  - 14 Atmospheric carbon isotope calculated by  $(\delta^{13}\text{C}_r + 18.67) / 1.1$  ([Arens et al., 2000](#))
  - 15 Atmospheric carbon dioxide estimated with  $S(z) = 2500$ ;  $\delta^{13}\text{C}_s = \text{column } 12$ ;  $\delta^{13}\text{C}_r = \text{column } 13$ ;  $\delta^{13}\text{C}_a = -6.5\text{‰}$  at  $T = 25^\circ\text{C}$
  - 16 Atmospheric carbon dioxide estimated with  $S(z) = 2500$ ;  $\delta^{13}\text{C}_s = \text{column } 12$ ;  $\delta^{13}\text{C}_r = \text{column } 13$ ;  $\delta^{13}\text{C}_a = \text{column } 14$
  - 17 Atmospheric carbon dioxide estimated with  $S(z) = 2000$ ;  $\delta^{13}\text{C}_s = \text{column } 11$ ;  $\delta^{13}\text{C}_r = \text{column } 13$ ;  $\delta^{13}\text{C}_a = \text{column } 14$
  - 18 Atmospheric carbon dioxide estimated with  $S(z) = 2000$ ;  $\delta^{13}\text{C}_s = \text{column } 12$ ;  $\delta^{13}\text{C}_r = \text{column } 13$ ;  $\delta^{13}\text{C}_a = \text{column } 14$
- Crossed data are invalable.

Mean 1868 2076 1600 1661

## References

Arens, N. C., Jahren, A. H., and Amundson, R.: Can C3 plants faithfully record the carbon isotopic composition of atmospheric carbon dioxide, *Paleobiology*, 26, 137–164, 2000,

Cohen, K. M., Harper, D. A. T., Gibbard, P. L., and Fan, J. X.: International Commission on Stratigraphy, URL: <http://www.stratigraphy.org/ICSchart/ChronostratChart2019-05.pdf>, 2019.

Ekart, D. D., Cerling, T. E., Montañez, I. P., and Tabor, N. J.: A 400 million year carbon isotope record of pedogenic carbonate: implications for paleoatmospheric carbon dioxide, *Am. J. Sci.*, 299, 805-827, 1999.

Romanek, C., Grossman, E. and Morse, J.: Carbon isotopic fractionation in synthetic aragonite and calcite: effects of temperature and precipitation rate *Geochim. Cosmochim. Ac.*, 56, 419-430, 1992.
