# Supplementary material for: Early Jurassic climate and atmospheric CO 2 concentration in the Sichuan paleobasin, Southwest China
Source: Copernicus journal article supplement (doi:10.5194/cp-2020-35), 2020-05-13
Supplement: Supplementary file 1 [file cp-2020-35-supplement.zip › Table S5-J1 Composite pCO2 Data by paleosol.pdf]

**Table S5 Global  $p$  CO<sub>2</sub> data of the Latest Triassic - Early Jurassic estimated by carbon isotope of pedogenic carbonates**

| Formation or identifier | Location                    | Age | Age (Ma) by author | Age (Ma) adjusted | Sam-ples | $\delta^{13}\text{C}_c$ | Sz by author | $p$ CO <sub>2</sub> by author | Reference             | $\delta^{13}\text{C}_{sc}$ | $\delta^{13}\text{C}_r$ | $\delta^{13}\text{C}_a$ | $p$ CO <sub>2</sub> updated |
|-------------------------|-----------------------------|-----|--------------------|-------------------|----------|-------------------------|--------------|-------------------------------|-----------------------|----------------------------|-------------------------|-------------------------|-----------------------------|
| Kayenta                 | Utah, America               | Toa | 175                | 177               | 3        | -4.5                    | 5000         | 4560                          | Ekart et al., 1999    | -13.36                     | -27.20                  | -7.75                   | 3411                        |
| Aztec                   | Nevada, America             | Toa | 177                | 179               | 2        | -7.3                    | 5000         | 1920                          |                       | -16.14                     | -27.40                  | -7.94                   | 1704                        |
| McCoy Brook             | Connecticut, America        | Het | 205                | 200               | 4        | -5.9                    | 5000         | 3010                          |                       | -14.75                     | -25.67                  | -6.36                   | 1583                        |
| New Haven Arkose        | Connecticut, America        | J1  | 208                | 190               | 7        | -7.64                   | 5000         | 2500                          | Cerling et al., 1991  | -16.47                     | -27.39                  | -7.93                   | 1554                        |
|                         |                             | J1  | 198                | 189               | 6        | -6.62                   | 5000         | 3010                          | Suchecki et al., 1988 | -15.46                     | -25.56                  | -6.26                   | 1264                        |
| McCoy Brook             | Texas, America              | Het | ?                  | 200.5             | 6        | -7.1                    | 5000         | 2480                          | Tanner et al., 2001   | -15.94                     | -26.03                  | -6.69                   | 1256                        |
| Boonton                 | Newark, New Jersey, America | Het | 200.36             | 200.36            | 2        | -5.61                   | 3000         | 2496                          | Schaller et al., 2011 | -14.46                     | -25.67                  | -6.36                   | 1710                        |
|                         |                             |     | 200.48             | 200.48            | 2        | -5.11                   | 3000         | 3131                          |                       | -13.96                     | -26.03                  | -6.69                   | 2139                        |
|                         |                             |     | 200.91             | 200.91            | 3        | -3.63                   | 3000         | 5273                          |                       | -12.50                     | -25.17                  | -5.91                   | 2545                        |
|                         |                             |     | 200.91             | 200.91            | 3        | -3.98                   | 3000         | 4941                          |                       | -12.84                     | -25.17                  | -5.91                   | 2317                        |
| Towaco                  |                             |     | 200.91             | 200.91            | 2        | -6.04                   | 3000         | 1949                          |                       | -14.89                     | -25.17                  | -5.91                   | 1335                        |
|                         |                             |     | 201.02             | 201.02            | 2        | -6.19                   | 3000         | 2356                          |                       | -15.03                     | -26.04                  | -6.70                   | 1612                        |
|                         |                             |     | 201.07             | 201.07            | 3        | -4.36                   | 3000         | 3708                          |                       | -13.22                     | -25.91                  | -6.58                   | 2531                        |
|                         |                             |     | 201.12             | 201.12            | 2        | -5.79                   | 3000         | 2642                          |                       | -14.64                     | -26.07                  | -6.73                   | 1807                        |
|                         |                             |     | 201.16             | 201.16            | 1        | -5.05                   | 3000         | 3460                          |                       | -13.91                     | -26.36                  | -6.99                   | 2363                        |
|                         |                             |     | 201.2              | 201.2             | 3        | -5.55                   | 3000         | 3014                          |                       | -14.40                     | -26.34                  | -6.97                   | 2061                        |
|                         |                             |     | 201.21             | 201.21            | 2        | -4.53                   | 3000         | 3657                          |                       | -13.39                     | -26.03                  | -6.69                   | 2494                        |
|                         |                             |     | 201.21             | 201.21            | 2        | -4.23                   | 3000         | 4015                          |                       | -13.09                     | -26.08                  | -6.74                   | 2738                        |
|                         |                             |     | 201.22             | 201.22            | 2        | -4.01                   | 3000         | 4050                          |                       | -12.87                     | -25.88                  | -6.55                   | 2759                        |
|                         |                             |     | 201.23             | 201.23            | 2        | -4.69                   | 3000         | 4070                          |                       | -13.55                     | -26.62                  | -7.23                   | 2781                        |
|                         |                             |     | 201.23             | 201.23            | 3        | -4.46                   | 3000         | 4234                          |                       | -13.32                     | -26.53                  | -7.15                   | 2891                        |
|                         |                             |     | 201.26             | 201.26            | 3        | -4.85                   | 3000         | 3453                          |                       | -13.71                     | -26.14                  | -6.79                   | 2356                        |
| Feltville               |                             |     | 201.28             | 201.28            | 2        | -4.16                   | 3000         | 3577                          |                       | -13.02                     | -25.55                  | -6.25                   | 2435                        |
|                         |                             |     | 201.39             | 201.39            | 3        | -4.64                   | 3000         | 3584                          |                       | -13.50                     | -26.06                  | -6.72                   | 2441                        |
|                         |                             |     | 201.45             | 201.45            | 2        | -3.72                   | 3000         | 4228                          |                       | -12.59                     | -25.74                  | -6.43                   | 2879                        |
|                         |                             |     | 201.49             | 201.49            | 3        | -4.56                   | 3000         | 4434                          |                       | -13.42                     | -26.81                  | -7.40                   | 3026                        |
| Passaic                 |                             |     | 201.51             | 201.51            | 3        | -8.58                   | 3000         | 1065                          |                       | -17.40                     | -25.67                  | -6.36                   | 721                         |
|                         |                             |     | 201.73             | 201.73            | 3        | -6.91                   | 3000         | 1787                          |                       | -15.75                     | -25.75                  | -6.44                   | 1227                        |
|                         |                             |     | 201.81             | 201.81            | 3        | -6.2                    | 3000         | 2242                          |                       | -15.04                     | -25.86                  | -6.54                   | 1535                        |
|                         |                             |     | 201.88             | 201.88            | 3        | -4.96                   | 3000         | 2253                          |                       | -13.82                     | -24.59                  | -5.38                   | 1537                        |
|                         |                             |     | 202.07             | 202.07            | 1        | -6.78                   | 3000         | 2263                          |                       | -15.62                     | -26.50                  | -7.12                   | 1552                        |
|                         |                             |     | 202.17             | 202.17            | 2        | -7.7                    | 3000         | 1597                          |                       | -16.53                     | -26.16                  | -6.81                   | 1099                        |
|                         |                             |     | 202.51             | 202.51            | 2        | -6.11                   | 3000         | 2419                          |                       | -14.96                     | -26.06                  | -6.72                   | 1656                        |
|                         |                             |     | 202.95             | 202.95            | 2        | -6.41                   | 3000         | 2231                          |                       | -15.25                     | -26.06                  | -6.72                   | 1528                        |
|                         |                             |     | 203.09             | 203.09            | 2        | -6.87                   | 3000         | 1947                          |                       | -15.71                     | -26.02                  | -6.68                   | 1335                        |
|                         |                             |     | 203.57             | 203.57            | 2        | -7.68                   | 3000         | 1532                          |                       | -16.51                     | -26.02                  | -6.68                   | 1063                        |
|                         |                             |     | 203.71             | 203.71            | 2        | -5.47                   | 3000         | 2782                          |                       | -14.32                     | -25.94                  | -6.61                   | 1902                        |
|                         |                             |     | 203.95             | 203.95            | 2        | -7.84                   | 3000         | 1475                          |                       | -16.67                     | -26.03                  | -6.69                   | 1017                        |

1) Age (Ma) in adjusted column is based on Cohen et al. (2019).

2)  $\delta^{13}\text{C}_r$  aged as 177 Ma and 179 Ma were cited from Xu et al., 2018; 189 Ma and 190 Ma from Peti et al., 2017; those older than 200 Ma cited from Schaller et al., 2011.

3) Updated  $p\text{CO}_2$  refers to text and parameters are same as the column **I8** (Sz=2000 ppmV) in Table S4.

## References cited

- Cerling, T. E.: Stable carbon isotopes in palaeosol carbonates, in: *Palaeoweathering, palaeosurfaces and related continental deposits*, edited by: Thiry, M. and Simm-Coinçon, R., *Spec. P Intl. Asso. Sedi.*, 27, 43-60, 1999.
- Cohen, K. M., Harper, D. A. T., Gibbard, P. L., and Fan, J. X.: International Commission on Stratigraphy, URL: <http://www.stratigraphy.org/ICSchart/ChronostratChart2019-05.pdf>, 2019.
- Ekart, D. D., Cerling, T. E., Montañez, I. P., and Tabor, N. J.: A 400 million year carbon isotope record of pedogenic carbonate: implications for paleoatmospheric carbon dioxide, *Am. J. Sci.*, 299, 805-827, 1999.
- Peti, L., Thibault, N., Clémence, M. E., Korte, C., Dommergues, J. L., Bougeault, C., Pellenard, P., Jelby, M. E., and Ullmann, C. V.: Sinemurian-Pliensbachian Calcareous Nannofossil Biostratigraphy and Organic Carbon Isotope Stratigraphy in the Paris Basin: Calibration to the Ammonite Biozonation of NW Europe, *Palaeogeogr. Palaeoclimatol. Palaeoecol.*, 468, 142–161, 2017.
- Schaller, M. F., Wright, J. D., and Kent, D. V.: Atmospheric pCO<sub>2</sub> perturbations associated with the Central Atlantic Magmatic Province, *Science*, 331, 1404-1409, doi, 10.1126/science.1199011, 2011.
- Suchecki, R. K., Hubert, F. F., and Birney de Wet, C. C.: Isotopic imprint of climate and hydrogeochemistry on terrestrial strata of the Triassic-Jurassic Hartford and Fundy rift basins, *J. Sediment. Petr.*, 58, 801-811, 1988.
- Tanner, L. H., Hubert, J. F., Coffey, B. P., and McInerney, D. P.: Stability of atmospheric CO<sub>2</sub> levels across the Triassic/Jurassic boundary, *Nature*, 411, 675-677, 2001.
- Xu, W. M., Ruhl, M., Jenkyns, H. C., Hesselbo, S. P., Riding, J. B., Selby, D., Naafs, B. D. A., Weijers, J. W. H., Pancost, R. D., Tegelaar, E. W., and Idiz, E. F.: Carbon sequestration in an expanded lake system during the Toarcian oceanic anoxic event, *Nat. Geosci.*, 129-135, doi, 10.1038/NGEO2871, 2017.
