# Supplementary material for: Early Jurassic climate and atmospheric CO 2 concentration in the Sichuan paleobasin, Southwest China
Source: Copernicus journal article supplement (doi:10.5194/cp-2020-35), 2020-05-13
Supplement: Supplementary file 1 [file cp-2020-35-supplement.zip › Table S6-J1 Composite pCO2 Data by stomata.pdf]

Table S6 Global  $p$  CO<sub>2</sub> data of the Latest Triassic - Early Jurassic by stomatal method

| Formation or identifier    | Location                                     | Age      | Age (Ma) by authors | Age (Ma) adjusted | Samp-les | SI   | $\sigma$ ( $\pm$ ) | SR   | $p$ CO <sub>2</sub> : SI/SR | Mean $p$ CO <sub>2</sub> | Species for stomata                   | Reference                                   |
|----------------------------|----------------------------------------------|----------|---------------------|-------------------|----------|------|--------------------|------|-----------------------------|--------------------------|---------------------------------------|---------------------------------------------|
| Höganäs and Hörö Sandstone | Scania, S Sweden                             | Rha      |                     | 202.9             |          | 8    | 0.30               |      | SI                          | 1200                     |                                       | McElwain et al., 1999                       |
|                            |                                              | Rha      |                     | 202.7             |          | 7    | 0.30               |      | SI                          | 1290                     |                                       |                                             |
|                            |                                              | Rha      |                     | 202.4             |          | 9.2  | 0.30               |      | SI                          | 1260                     |                                       |                                             |
|                            |                                              | Rha      |                     |                   |          | 8.9  | 0.90               |      | SI                          |                          |                                       |                                             |
|                            |                                              | Rha      |                     | 202.1             |          | 9.8  | 0.40               |      | SI                          | 1320                     |                                       |                                             |
|                            |                                              | Rha      |                     |                   |          | 10.7 | 0.30               |      | SI                          |                          |                                       |                                             |
|                            |                                              | Rha      |                     | 201.8             | 2        | 7.9  | 0.20               |      | SI                          | 1590                     |                                       |                                             |
|                            |                                              | Rha      |                     |                   | 2        | 9.9  | 1.10               |      | SI                          |                          |                                       |                                             |
|                            |                                              | Rha      | 205.7               | 201.3             | 2        | 8.1  | 0.60               |      | SI                          |                          |                                       |                                             |
|                            |                                              | Het      | 205.7               | 201.2             | 2        | 3.8  | 0.30               |      | SI                          | 2160                     |                                       |                                             |
|                            | Jameson Land, Greenland                      | Het      |                     | 201.1             | 2        | 3.9  | 0.40               |      | SI                          | 1980                     |                                       |                                             |
|                            |                                              | Het      |                     | 201.0             | 2        | 10.1 | 1.10               |      | SI                          | 840                      |                                       |                                             |
|                            |                                              |          | 202.2               | 201.0             | ?        | 4.70 | 0.30               |      | SI                          | 1443                     |                                       |                                             |
|                            |                                              | M. Het   | 201.2               | 200.0             | 6        | 6.80 | 0.70               |      | SI                          | 997                      | " <i>Ginkgoites</i> " <i>obovatus</i> |                                             |
|                            |                                              | Het      |                     |                   | 2        | 10.1 | 0.40               |      | SI                          |                          |                                       |                                             |
|                            |                                              | E. Het   | 200.2               | 201.0             | 18       | 8.50 | 0.60               |      | SI                          | 798                      | " <i>Ginkgoites</i> " <i>acosmia</i>  |                                             |
|                            | Yorkshire, England                           |          | 183.0               | 183.1             |          |      |                    |      | SI                          | 950                      |                                       | McElwain et al., 2005                       |
|                            |                                              |          | 183.0               | 183.0             |          |      |                    |      | SI                          | 1050                     |                                       |                                             |
|                            |                                              |          | 187.6               | 183.0             |          |      |                    |      | SI                          | 490                      |                                       |                                             |
|                            |                                              |          | 203.0               | 200.0             |          |      |                    |      | SI                          | 1194                     |                                       | Retallack, 2001                             |
|                            |                                              |          | 203.0               | 200.0             |          |      |                    |      | SI                          | 1994                     |                                       |                                             |
| beds of Postera, Contorta, | Germanic Basin,                              | Rha      |                     | 201.4             | 4        | 4.26 |                    | 2.66 | SR                          | 1596                     | <i>Lepidopteris ottonis</i> and       | Bonis et al., 2010                          |
|                            |                                              | Rha      |                     | 201.8             | 4        | 3.57 |                    | 3.17 | SR                          | 1902                     |                                       |                                             |
|                            |                                              | Rha      |                     | 201.9             | 3        | 2.53 |                    | 4.47 | SR                          | 2682                     |                                       |                                             |
|                            |                                              | Rha      |                     | 202.0             | 2        | 2.45 |                    | 4.63 | SR                          | 2778                     |                                       |                                             |
|                            |                                              | Rha      |                     | 202.0             | 4        | 3.35 |                    | 3.38 | SR                          | 2028                     |                                       |                                             |
|                            |                                              | Rha      |                     | 202.0             | 7        | 3.16 |                    | 3.58 | SR                          | 2148                     |                                       |                                             |
|                            |                                              | Rha      |                     | 202.1             | 6        | 3.54 |                    | 3.20 | SR                          | 1920                     |                                       |                                             |
|                            |                                              | Rha      |                     | 202.2             | 2        | 3.12 |                    | 3.63 | SR                          | 2178                     |                                       |                                             |
|                            |                                              | Rha      |                     | 202.5             | 5        | 2.92 |                    | 3.88 | SR                          | 2328                     |                                       |                                             |
| ?                          | Astartekløft in Jameson Land, East Greenland | Rha      |                     | 202.7             | 7        | 2.47 |                    | 4.58 | SR                          | 2748                     |                                       |                                             |
|                            |                                              | Het      |                     | 198.0             |          | 5.39 | 0.43               |      | SR                          | 1354                     | <i>Ginkgo</i>                         |                                             |
|                            |                                              | Het      |                     | 199.0             |          | 5.78 | 0.24               |      | SR                          | 1223                     |                                       |                                             |
|                            |                                              | Het      |                     | 199.8             |          | 2.59 | 0.55               |      | SR                          | 2971                     |                                       |                                             |
|                            |                                              | Rha      |                     | 201.4             |          | 3.18 | 0.16               |      | SR                          | 2184                     |                                       |                                             |
|                            |                                              | Rha      |                     | 201.8             |          | 4.11 | 0.30               |      | SR                          | 1673                     |                                       |                                             |
|                            |                                              | Rha      |                     | 202.0             |          | 8.19 | 0.81               |      | SR                          | 932                      |                                       |                                             |
|                            |                                              | Rha      |                     | 202.3             |          | 6.20 | 0.40               |      | SR                          | 1266                     |                                       |                                             |
| Lower Marburg Subgroup     | Eeastern Australia                           | Late Pls | 184.0               | 184.0             | 10       | 8.88 | 0.48               |      | SI                          | 856                      |                                       | Steinthorsdottir and Vajda, 2015            |
|                            |                                              |          |                     |                   |          |      |                    |      |                             |                          |                                       |                                             |
| Yima                       | Henan, China                                 | E. Toa   |                     | 182.0             | 13       | 5.60 | 1.90               | 3.60 | SR                          | 2160                     | <i>Ginkgo yimaensis</i>               | Chen et al., 2001                           |
| Dzungaria                  | Xinjiang, China                              | L. Sin   |                     | 192.0             | 28       | 6.70 | 0.04               | 1.40 | SR                          | 840                      | <i>Ginkgo obrutschewi</i>             |                                             |
|                            | Suiskiou, China                              | E. Rha   | 204.4               | 205.0             | 3        | 7.00 | 0.30               |      | SI                          | 969                      | cf. <i>Lepidopteris ottonis</i>       | Sze, 1953                                   |
|                            | Astarte River, Greenland                     | E. Rha   | 202.2               | 204.0             | 6        | 6.90 | 2.10               |      | SI                          | 983                      | <i>Lepidopteris ottonis</i>           | Townrow 1960                                |
|                            | Bjuv, Sweden                                 | M. Rha   | 203.5               | 204.5             | 1        | 8.90 | 0.00               |      | SI                          | 762                      | " <i>Ginkgoites</i> " <i>obovatus</i> | Florin 1937                                 |
|                            | Bjuv, Sweden                                 | M. Rha   | 202.2               | 204.0             | 4        | 7.50 | 1.00               |      | SI                          | 904                      | <i>Lepidopteris ottonis</i>           | Dobruskina 1980; Lindström & Erlström, 2006 |

|          |                               |          |       |       |    |      |      |         |      |                                   |                                             |
|----------|-------------------------------|----------|-------|-------|----|------|------|---------|------|-----------------------------------|---------------------------------------------|
|          | Billesholm, Sweden            | L. Rha   | 203.2 | 203.2 | 5  | 6.00 | 0.60 | SI      | 1130 | <i>"Ginkgoites" troedssoni</i>    | Lundblad 1959; Lindström & Erlström, 2006   |
|          | NW Scania Sweden              | L. Rha   | 203.2 | 203.2 | 25 | 5.90 | 0.20 | SI      | 1149 | <i>"Ginkgoites" troedssoni</i>    | Beerling et al. 1998;                       |
|          |                               | L. Rha   | 203.2 | 203.2 | 25 | 6.50 | 0.40 | SI      | 1043 | <i>"Ginkgoites" marginata</i>     | Lindström and Erlström, 2006                |
|          |                               | E. Het   | 199.2 | 200.0 | 25 | 5.70 | 0.30 | SI      | 1189 |                                   |                                             |
| x        | Komló Hungary                 | E. Sin   |       | 199.0 | 1  | 5.40 | 0.20 | SI      | 1256 | <i>"Ginkgoites" marginata</i>     | Barbacka & Weislo-Luranc 2002               |
|          |                               | E. Sin   |       | 198.0 | 1  | 7.50 | 0.40 | SI      | 904  | <i>"Ginkgoites" minuta</i>        |                                             |
|          | Gradzanowo, Poland            | E. Rha   |       | 203.0 | 1  | 7.10 | 0.60 | SI      | 955  | <i>"Ginkgoites" acosmia</i>       |                                             |
|          | Bayreuth, Germany             | M. Het   | 198.2 | 200.0 | 2  | 7.20 | 0.50 | SI      | 942  | <i>Ginkgo taeiata</i>             | Collinson et al. 1998                       |
|          | Yagnob, uzbekistan            | E. Sin   | 205.5 | 198.0 | 2  | 7.60 | 0.60 | SI      | 892  | <i>Ginkgo ferganensis</i>         | Khudaiberdyev et al. 1971                   |
|          | Sulyakta, Uzbekistan          | E. Baj   | 165.8 | 170.0 | 4  | 7.10 | 0.70 | SI      | 955  | <i>Ginkgo suluktensis</i>         |                                             |
| Yaojia   | Aganzhen, China               | M. Pls   |       | 186.0 | 13 | 5.80 | 0.20 | 4.50 SR | 1252 | <i>Ginkgo aganzhenense</i>        | Xie et al., 2006                            |
| Ya'an    | Yaojie, China                 | E. Aal   |       | 173.0 | 20 | 6.10 | 0.81 | 4.00 SR | 1190 | <i>Ginkgo huttoni</i>             |                                             |
|          | Heilgersdorf, Germany         | Rha      | 204.4 | 204.0 | 1  | 6.80 |      | SI      | 997  | <i>Lepidopteris sp. indet.</i>    | Kelber & van Konijnenberg-van Cittert, 1997 |
|          | Hällviken, Sweden             | Rha      | 202.2 | 202.0 | 3  | 6.30 | 1.90 | SI      | 1076 | cf. <i>"Lepidopteris" ottonis</i> | Lundblad, 1949                              |
|          | Bosarp, Sweden                | Rha      | 202.2 | 202.0 | 1  | 8.70 |      | SI      | 779  | <i>"Lepidopteris" ottonis</i>     |                                             |
|          | Stabbarp                      | Rha      | 202.2 | 202.0 | 1  | 7.30 | ?    | SI      | 929  | <i>"Ginkgoites" marginata</i>     | Lundblad, 1959                              |
|          | Hälsingborg, Sweden           | Pli-Toar | 190.4 | 182.0 | 3  | 6.10 | 1.30 | SI      | 1111 | <i>"Ginkgoites" marginata</i>     |                                             |
|          | Rawicz, Poland                | Rha      | 202.2 | 202.0 | 2  | 8.10 | 0.40 | SI      | 837  | <i>"Lepidopteris" ottonis</i>     | Piwocki, 1970                               |
|          | Astarte, Greenland            | Rha      | 202.2 | 202.0 | 3  | 7.30 | ?    | SI      | 929  | <i>"Ginkgoites" obovatus</i>      | Harris 1935                                 |
|          | Vardekløft, Greenland         | Liassic  | 198.2 | 195.0 | 2  | 4.00 | ?    | SI      | 1695 | <i>"Ginkgoites"</i>               |                                             |
|          | Pennyhilm and Whitby, England | Aal      | 177.5 | 172.0 | 2  | 3.80 | ?    | SI      | 1784 | <i>Ginkgo</i>                     | Harris 1974                                 |
|          | Anina, Romania                | Het-Sim  | 194.4 | 199.0 | 6  | 6.00 | 1.60 | SI      | 1130 | <i>Ginkgo marginata</i>           | Czier, 1998                                 |
|          | Derwent River, England        | Ael      | 176.5 | 172.0 | 1  | 6.90 | ?    | SI      | 983  | <i>Ginkgo huttoni</i>             | McElwain & Chaloner, 1996                   |
| Yanchang | Huating of Gansu, NW          | T3       | 204.8 | 204.8 |    | 3.70 |      | 3.27 SR | 1962 | <i>Ginkgoites magnifolius</i>     | Wu et al., 2016                             |
| Ya'an    | Anganzhen of Gansu, China     | J1dx     | 193.0 | 193.0 |    | 5.80 |      | 2.09 SR | 1252 | <i>Ginkgo aganzhenense</i>        | Sun et al., 2007                            |
|          |                               | J2y2     | 183.0 | 183.0 |    | 6.10 |      | 1.98 SR | 1190 | <i>Ginkgo huttoni</i>             |                                             |
|          |                               | J2y4-5   | 171.0 | 171.0 | 15 | 3.83 | 0.30 | 3.16 SR | 1896 |                                   |                                             |
|          |                               | J2y4-4   | 170.0 | 170.0 | 14 | 3.97 | 0.27 | 3.05 SR | 1830 |                                   |                                             |

Age adjustment by the International Chronostratigraphy Chart (Cohen et al., 2019)

SI, Stomatal index

SR, stomatal ratio

Beerling, D. J. and Royer, D. L.: Reading a CO<sub>2</sub> signal from fossil stomata, The New Phytologist, 153, 387-397, doi:10.1046/j.0028-646X.2001.00335.x, 2002.

Beerling, G. J., McElwain, J. C., and Osborne, C. P.: Stomatal responses of the "living fossil" *Ginkgo biloba* L. to changes in atmospheric CO<sub>2</sub> concentrations, J. Experi. Bot., 49, 1603-1607, doi:10.1093/jexbot/49.326.1603, 1998.

Bonis, N. R., Van Konijnenburg-Van Cittert, J. H. A., and Kürschner, W. M.: Changing CO<sub>2</sub> conditions during the end-Triassic inferred from stomatal frequency analysis on *Lepidopteris ottonis* (Goeppert) Schimper and *Ginkgoites taeniatus* (Braun) Harris, Palaeogeogr. Palaeoclimatol. Palaeoecol., 295, 146-161, 2010.

Bose, M. N.: Leaf cuticle and other plant microfossils from the Mesozoic rocks of Andoya, Norway, Palaeobotanist, 8, 1-7, 1961.

Brown, J.T.: Upper Jurassic and Lower Cretaceous ginkgophytes from Montana, J. Paleontol., 49, 724-730, 1975.

Chen, L. Q., Li, C. S., Chaloner, W. G., Beerling, D. J., Sun, Q. G., Collinson, M. E., and Mitchell, P. L.: Assessing the potential for the stomatal characters of extant and fossil Ginkgo leaves to signal atmospheric CO<sub>2</sub> change, *Am. J. Bot.*, 88(7), 1309–1315, 2001.

Collinson, M. E., Möslé, B., Finch, P., Scott, A. C., and Wilson, R.: The preservation of plant cuticle in the fossil record: a chemical and microscopical investigation, *Anci. Biomole.*, 2, 251–265, 1998.

Cziesler, Z.: Ginkgo foliage from the Jurassic of the Carpathian Basin, *Palaeontology*, 41(2), 349–381, 1998.

Ding, S. T., Sun, B. N., Wu, J. Y., and Li, X. C.: Cuticular composition and isotope characteristics of Jurassic *Phoenicops* (*Phoenicops*) *angustifolia* Heer from Huating in Gansu province, China, *J. Lanzhou Uni. (Nat Sci)* 46(1), 14–21, 2010 (in Chinese with English abstract).

Doludenko, M. P. and Lebedev, Y. L.: "Ginkgoites sibirica" y "G. huttoni" vostochny Sibir [ "Ginkgoites sibirica" and "G. huttoni" of eastern Siberia], *Trudy Geologicheskogo Instituta Akademii Nauk SSSR*, 230, 82–102, 1972.

Florin, R.: Die fossile Ginkgophyten von Franz-Joseph-Land, nebst Erörterungen über vermeintliche Cordaitales mesozoischen Alters. Part 2. Allgemeiner Teil, *Palaeontographica*, B82, 1–72, 1937.

Harris, T. M.: The fossil flora of Scoresby Sound East Greenland. Part 4: Ginkgoales, Coniferales, Lycopodiales and isolated fructifications. *Meddelelser om Grønland*, 112(1), 175, 1935.

Harris, T. M., Millington, W., and Miller, J.: The Yorkshire Jurassic flora volume IV 1 Ginkgoales and 2 Czekanowskiales, *Brit. Mus. Nat. Hist.*, London, 150, 1974.

Kelber, K. P. and van Konijnenberg-van Cittert, J. H. A.: A new Rhaetian flora from the neighbourhood of Cobourg (Germany) - preliminary results. Fourth European Paleobotanical and Palynological Conference Proceedings, Heerlen 1994, *Mededelingen Nederlandse Instituut Toegepaste Geowetenschappen TNO*, 58, 101–113, 1997.

Khudaiberdiyev, R., Gomolitsky, N. P., and Lobanova, A. V.: Materialy k yurskoi flora yuzhnoi Fergani [Specimens from the Jurassic flora of southern Fergana, in: *Paleobotanika Uzbekistana* (Paleobotany of Uzbekistan), edited by: Sixtel, T. A., *Akademiya Nauk Uzbekskoye SSSR*, Tashkent, 3–57, 1971.

Lindström, S. and Erlström, M.: The late Rhaetian transgression in southern Sweden: regional (and global) recognition and relation to the Triassic–Jurassic boundary, *Palaeogeogr. Palaeoclimatol. Palaeoecol.*, 241, 339–372, 2006.

Lundblad, A. B.: Die geologiska resultaten från bormningarna vid Hållviken. Del. 4 On the presence of *Lepidopteris* in cores from "Hållviken II", *Sveriges Geologiska Undersökning Series C number 57 Åsbok*, 43(5), 11, 1949.

Lundblad, A. B.: Studies in the Rhaeto-Liassic floras of Sweden II:1 Ginkgophyta from the mining district of NW Scania, *Kungliga Svenska Vetenskapsakademien Handlingar Fjärde Serien*, 6(2), 1–37, 1959.

Manum, S. B., Bose, M. N., and Vigran, J. O.: The Jurassic flora of Andoya, northern Norway, *Rev. Palaeobot. Palyno.*, 68, 233–256, 1991.

McElwain, J. C. and Chaloner, W. C.: The fossil cuticle as a skeletal record of environmental change, *Palaos* 11(4), 376–388, 1996.

McElwain, J. C.: Do fossil plants signal palaeoatmospheric CO<sub>2</sub> concentration in the geological past?, *Philos. Trans. Roy. Soc. London*, B353, 83–96, 1998.

McElwain, J. C., Beerling, D. J., and Woodward, F. I.: Fossil plants and global warming at the Triassic–Jurassic boundary, *Science*, 285, 1386–1390, 1999.

McElwain, J. C., Wade-Murphy, J., and Hesselbo, S. P.: Changes in carbon dioxide during an oceanic anoxic event linked to intrusion into Gondwana coals, *Nature*, 435, 479–482, doi, org/10. 1038/nature03618, 2005.

Oishi, S.: A study of the cuticles of some Mesozoic gymnospermous plants from China and Manchuria, *Science Reports of Tohoku Imperial Uni., Second Series (Geol.)*, 12(2B), 239–252, 1933.

Piwocki, M.: *Lepidopteris ottonis* z relikwitu południowej części monokliny przedsudeckiej (*Lepidopteris ottonis*) from the Rhaetic deposits of the southern part of the Fore-Sudetic Monocline, *Kwartalnik Geologiczny*, 14, 101–106, 1970.

Retallack, G. J.: A 300-million-year record of atmospheric carbon dioxide from fossil plant cuticles, *Nature*, 411, 287–290, 2001.

Schweitzer, H. J. and Kirchner, M.: Die Rhaetio-Jurassischen Floren des Iran und Afghanistans 8 Ginkgophyta, *Palaeontographica*, B237, 1–58, 1995.

Steinthorsdottir, M. and Vajda, V.: Early Jurassic (late Pliensbachian) CO<sub>2</sub> concentrations based on stomatal analysis of fossil conifer leaves from eastern Australia, *Gondwana Res.* 27, 829–897, 2015.

Steinthorsdottir, M., Jeram, A. J., and McElwain, J. C.: Extremely elevated CO<sub>2</sub> at the Triassic–Jurassic boundary, *Palaeogeogr. Palaeoclimatol. Palaeoecol.*, 308, 418–432, 2011.

Stopes, M. C.: The flora of the Inferior Oolite of Brora (Sutherland). *J. Geol. Soc. London*, 63, 375–382, 1907.

Sun, C. L., Tan, X., and Dilcher, D. L., Wang, H. S., Na, Y. L., Li, T., Li, Y. F.: Middle Jurassic Ginkgo leaves from the Daohugou area, Inner Mongolia, China and their implication for palaeo-CO<sub>2</sub> reconstruction, *Palaeoworld*, 27, 467–481, 2018.

Sun, B. N., Xiao, L., Xie, S. P., Deng, S. H., Wang, Y. D., Jia, H., and Turner, S.: Quantitative analysis of paleoatmospheric CO<sub>2</sub> level based on stomatal characters of fossil Ginkgo from Jurassic to Cretaceous in China, *Acta Geol. Sin.*, 81(6), 931–939, 2007.

Sze, H. C.: On the cuticles of *Lepidopteris* remains from Sinkiang, northwestern China, *Acta Sci. Sin.*, 2(4), 323–326, 1953.

Townrow, J. A.: The Peltaspermeae, a pteridosperm family of Permian and Triassic age, *Palaeontology*, 3, 333–361, 1960.

Tralau, H.: Botanical investigations in the fossil flora of Eriksdal in Fyledalen, Scania, *Sveriges Geol. Undersökning Series C NR*, 611, 1–36, 1966.

Wu, J. Y., Ding, S. T., Li, Q. J., Sun, B. N., and Wang, Y. D.: Reconstructing palaeoatmospheric CO<sub>2</sub> levels based on fossil Ginkgoites from the Upper Triassic and Middle Jurassic in Northwest China. *Paläontol. Zeits.*, 90 (2), 377–387, 2016.

Xie, S. P., Sun, B. N., Yan, D. F., Xiao, L., and Wei, L. J.: Leaf cuticular characters of Ginkgo and implications for paleoatmospheric CO<sub>2</sub> in the Jurassic, *Prog. Nat. Sci.*, 16, 258–263, 2006. (in Chinese with English abstract).

Yan, D. F., Sun, B. N., Xie, S. P., Li, X. C., and Wen, W. W.: Response to paleoatmospheric CO<sub>2</sub> concentration of *Solenites vimineus* (Phillips) Harris (Ginkgophyta) from the Middle Jurassic of the Yaojie Basin, Gansu Province, China, *Sci. China (Ser. D)*, 52(12), 2029–2039, 2009.

Zhao, L. M., Ohana, T. and Kimura, T.: A fossil population of Ginkgo leaves from the Xingyuan Formation, Inner Mongolia, *Paleontol. Soc. Japan Trans. Proc.*, 169, 73–89, 1993.
